# Supplementary material
Source: publisher figshare collection journal article supplement (https://frontiersin.figshare.com/ndownloader/files/17944028)
Supplement: Supplementary file [file 17944028]

Supplementary Table 2 - Pairwise single nucleotide polymorphism counts between strains of ST57 strains under investigation. The reference strain utilised was Liv111.

|            |     |      |      |      |      |      |     |     |
|------------|-----|------|------|------|------|------|-----|-----|
| Liv111_R1  | 0.0 | 3.0  | 3.0  | 1.0  | 5.0  | 9.0  | 1.0 | 0.0 |
| Liv114M_R1 | 3.0 | 0.0  | 6.0  | 4.0  | 6.0  | 10.0 | 2.0 | 3.0 |
| Liv30_R1   | 3.0 | 6.0  | 0.0  | 4.0  | 6.0  | 10.0 | 4.0 | 3.0 |
| Liv40M_R1  | 1.0 | 4.0  | 4.0  | 0.0  | 6.0  | 10.0 | 2.0 | 1.0 |
| Liv79MB_R1 | 5.0 | 6.0  | 6.0  | 6.0  | 0.0  | 10.0 | 4.0 | 5.0 |
| Liv95M_R1  | 9.0 | 10.0 | 10.0 | 10.0 | 10.0 | 0.0  | 8.0 | 9.0 |
| Liv96MA_R1 | 1.0 | 2.0  | 4.0  | 2.0  | 4.0  | 8.0  | 0.0 | 1.0 |
| Reference  | 0.0 | 3.0  | 3.0  | 1.0  | 5.0  | 9.0  | 1.0 | 0.0 |
